# Supplementary material for: 3D Si/C particulate nanocomposites internally wired with graphene networks for high energy and stable batteries
Source: Royal Society of Chemistry journal article supplement (doi:10.1039/c5ta04681e), 2015-01-01
Supplement: c5ta04681e1.pdf [file c5ta04681e1.pdf]

# 3D Si/C Particulate Nanocomposites Internally-Wired with Graphene Networks for High Energy and Stable Batteries

Jaegyeong Kim<sup>a</sup>, Changil Oh<sup>a</sup>, Changju Chae<sup>a,b</sup>, Dae-Hoon Yeom<sup>a</sup>, Jaeho Choi<sup>a</sup>,  
Nahyeon Kim<sup>a</sup>, Eun-Suok Oh<sup>c</sup>, Jung Kyoo Lee<sup>a\*</sup>

<sup>a</sup>Department of Chemical Engineering, Dong-A University, Busan 604-714, Republic of Korea

<sup>b</sup>Division of Advanced Materials, Korea Research Institute of Chemical Technology (KRICT), Daejeon 305-600, Republic of Korea

<sup>c</sup>School of Chemical Engineering & Bioengineering, University of Ulsan, Ulsan 680-749, Republic of Korea

## Supporting Information

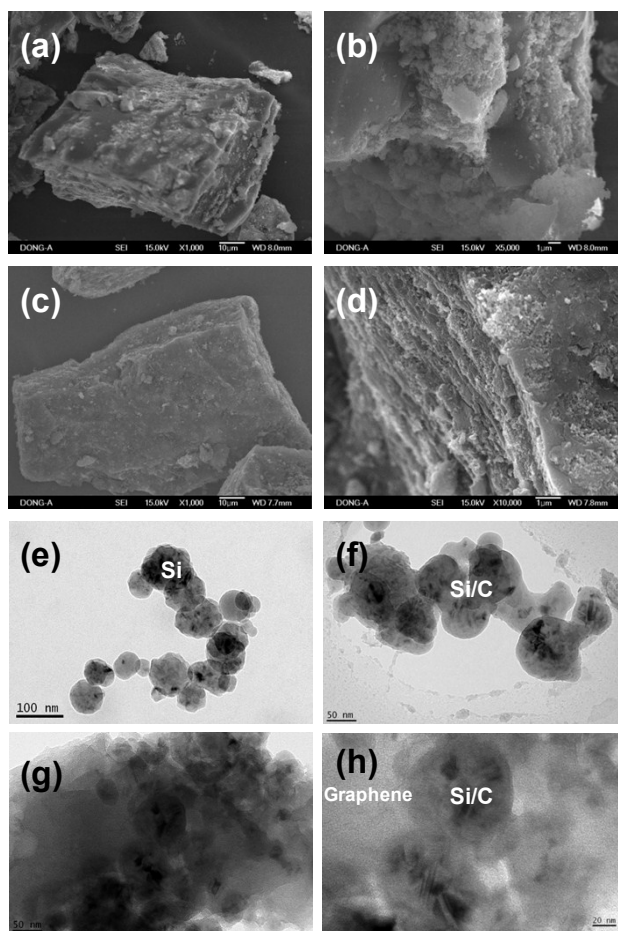

**Figure S1.** SEM images of (a, b) Si/C-IWGN-1, (c, d) Si/C-IWGN-2, and TEM images of (e) SiNPs, (f) Si/C-1 and (g, h) Si/C-IWGN-1.

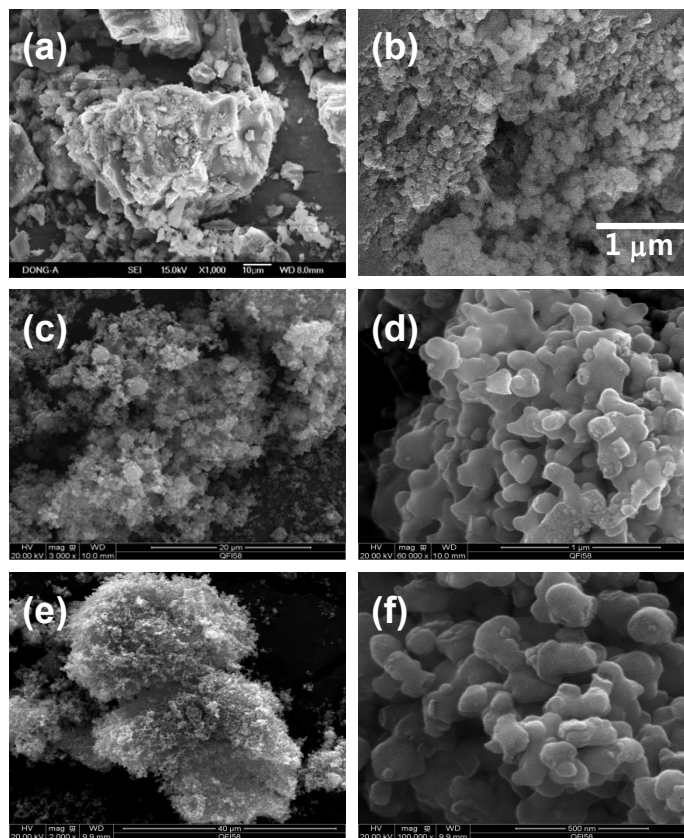

**Figure S2.** SEM images of (a, b) Si/C-1, (c, d) Si/C-2 and (e, f) Si/C-3.

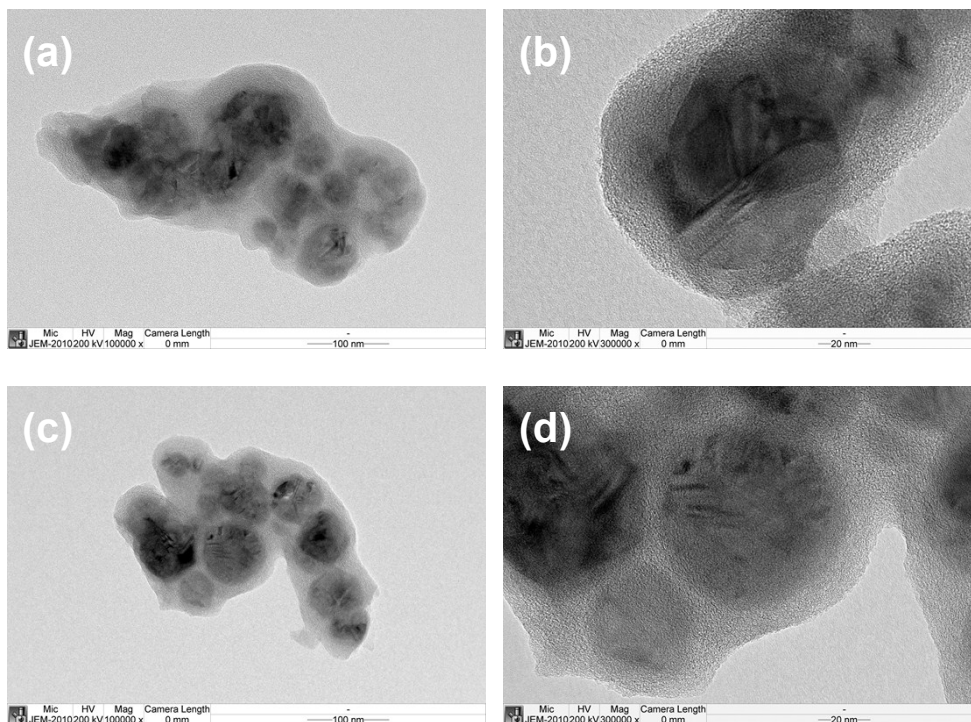

**Figure S3.** TEM images of (a, b) Si/C-2 and (c, d) Si/C-3.

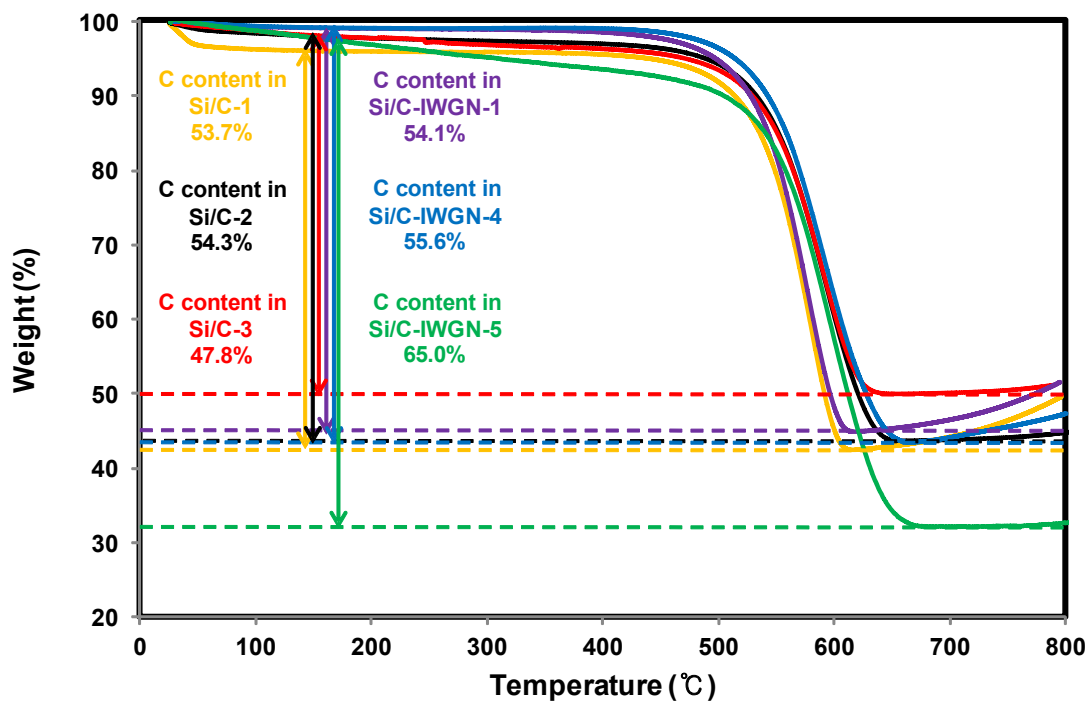

**Figure S4.** TGA profiles of reference Si/C samples, Si/C-IWGN-1, Si/C-IWGN-4 and Si/C-IWGN-5 run in air flow.

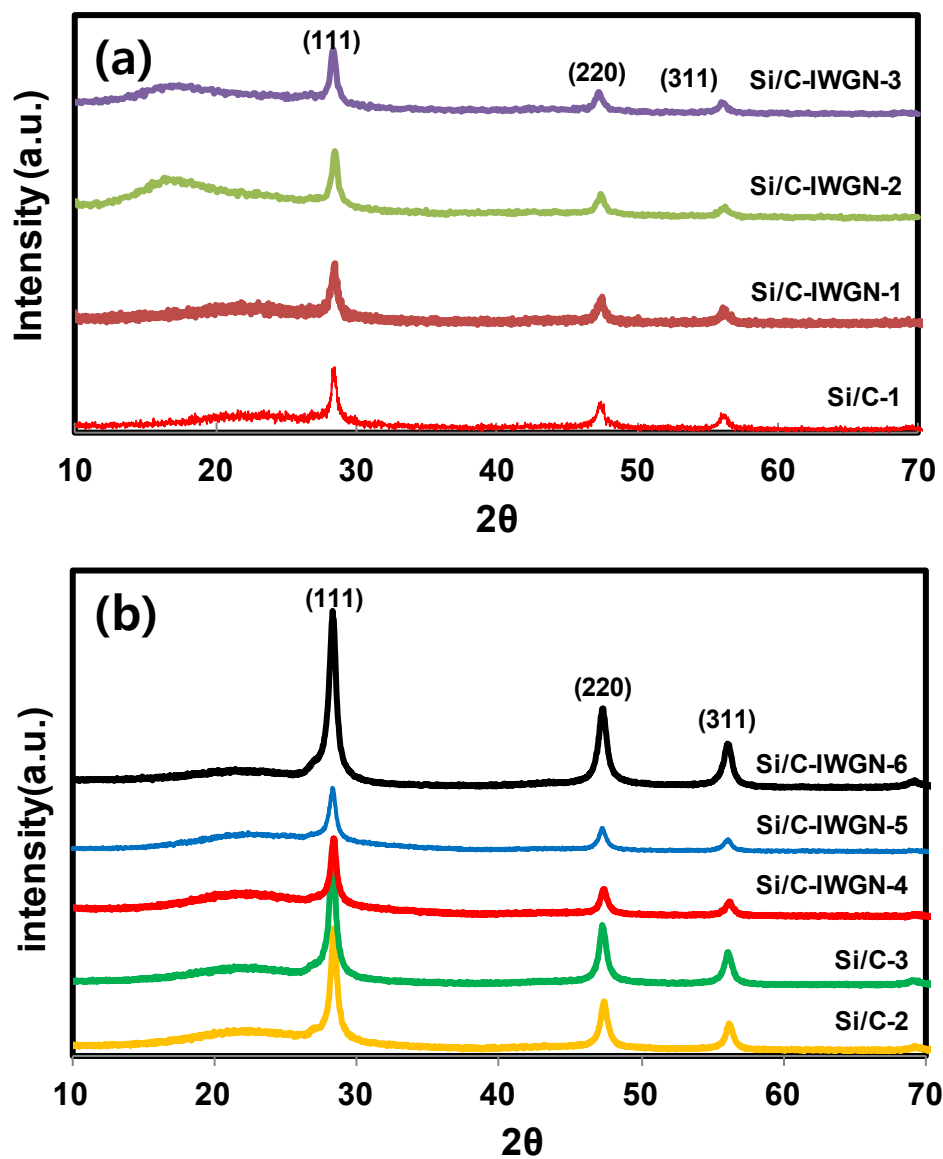

**Figure S5.** XRD patterns of (a) Si/C-1 and Si/C-IWGN-1~3 and (b) Si/C-2 and Si/C-IWGN-4~6 series samples.

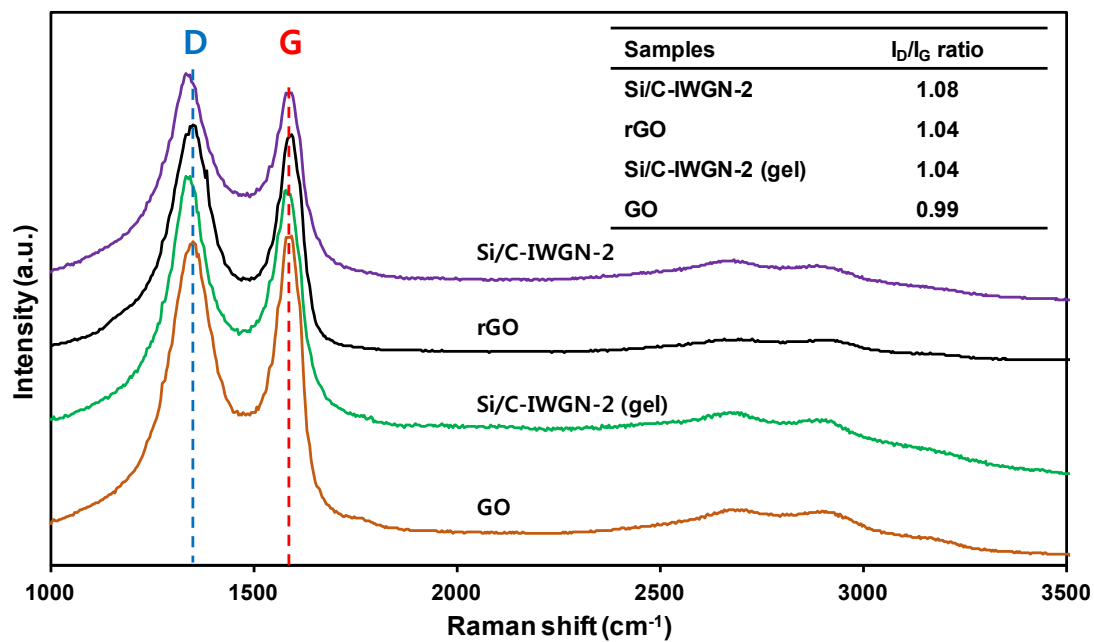

**Figure S6.** (a) FTIR and (b) Raman spectra of GO, Si/C-IWGN-2(gel), thermally reduced rGO and Si/C-IWGN samples.

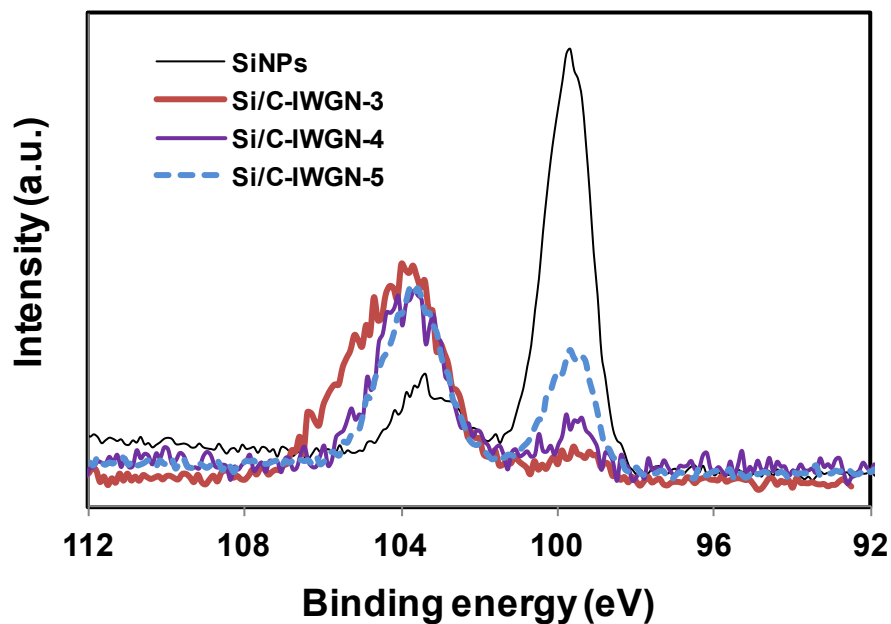

**Figure S7.** X-ray photoelectron spectra of SiNPs, Si/C-IWGN-3, Si/C-IWGN-4 and Si/C-IWGN-5.

**Table S1.** Electrode sheet resistance and conductivity

| Electrodes  | Sheet resistance <sup>a</sup><br>(mΩ per square) | Coating<br>thickness <sup>b</sup> (μm) | Resistivity <sup>c</sup><br>(Ω·cm) | Conductivity <sup>d</sup><br>(S·cm <sup>-1</sup> ) |
|-------------|--------------------------------------------------|----------------------------------------|------------------------------------|----------------------------------------------------|
| Si/C-1      | 1.97                                             | 40.3                                   | 7.9'10 <sup>-6</sup>               | 1.3'10 <sup>5</sup>                                |
| Si/C-IWGN-1 | 2.28                                             | 39.3                                   | 9.0'10 <sup>-6</sup>               | 1.1'10 <sup>5</sup>                                |
| Si/C-IWGN-2 | 38.15                                            | 36.2                                   | 1.4'10 <sup>-4</sup>               | 7.1'10 <sup>3</sup>                                |
| Si/C-IWGN-3 | 56.52                                            | 36.0                                   | 2.0'10 <sup>-4</sup>               | 5.0'10 <sup>3</sup>                                |

Notes; <sup>a</sup>Sheet resistances are average values on 10~12 different measurements, <sup>b</sup>coating thicknesses are average values on 6 different measurements, <sup>c</sup>Resistivity = (sheet resistance) / (coating thickness) and <sup>d</sup>Conductivity = (Resistivity)<sup>-1</sup>.

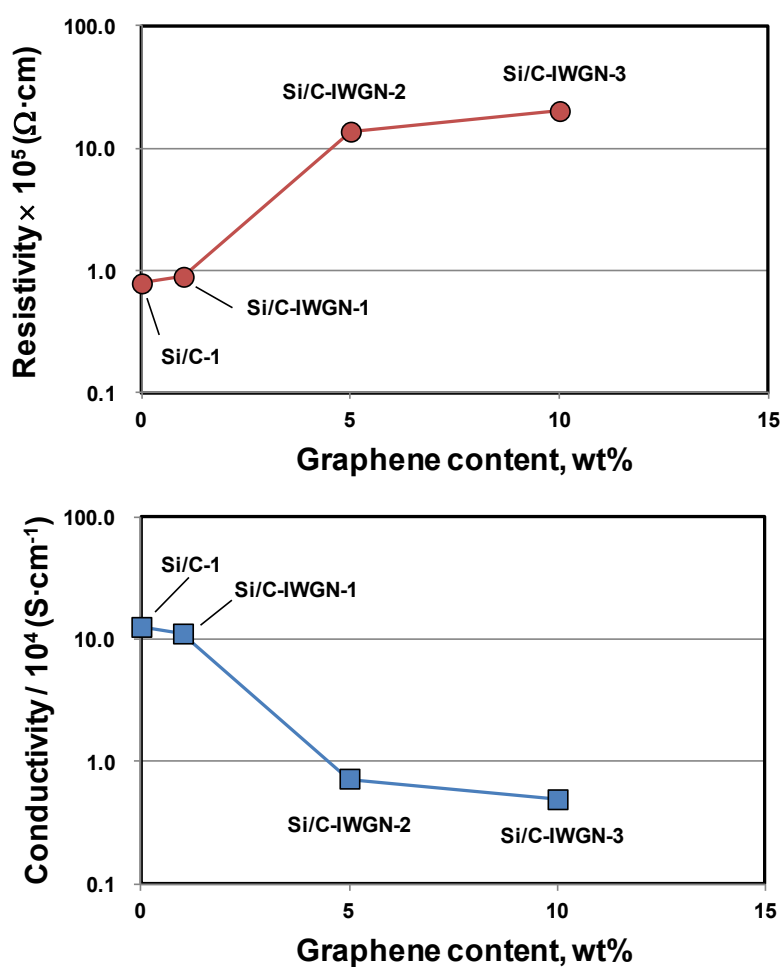**Figure S8.** Sheet resistivity and conductivity measured on electrodes of Si/C-1 and Si/C-IWGN-1~3 series samples.

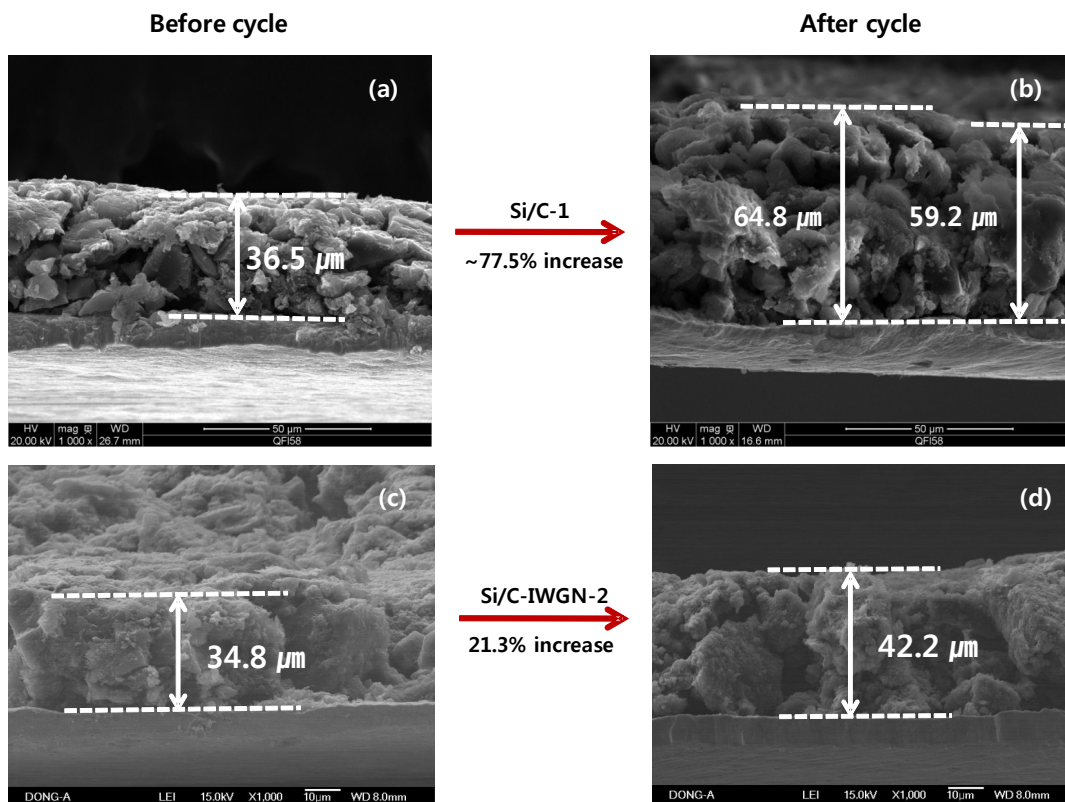

**Figure S9.** SEM images of (a, b) Si/C-1 and (c, d) Si/C-IWGN-2 before (left column) and after cycling for 50 cycles at  $0.5 \text{ A g}^{-1}$ .

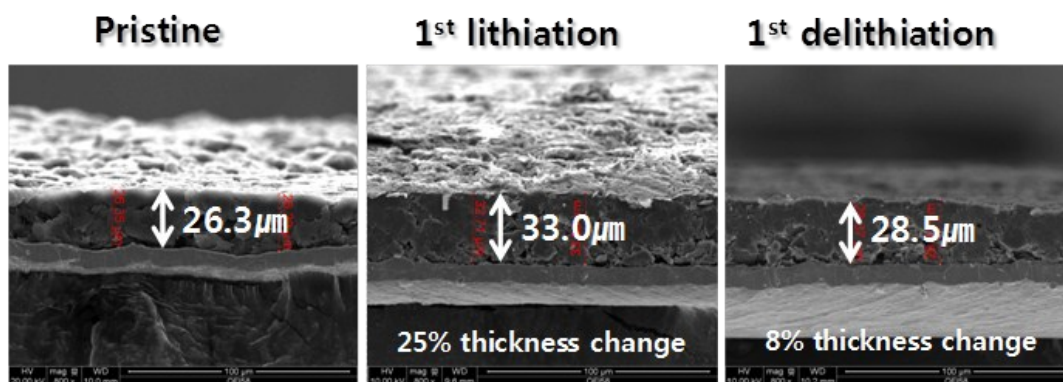

**Figure S10.** SEM images of electrode cross-sections of graphite for its pristine and after the first lithiation and delithiation.

**Table S2.** Coating densities and volumetric capacities electrodes

| Samples                                                                                   | Si/C-IWGN-3 | Si/C-IWGN-6 | Si-Gr | Graphite |
|-------------------------------------------------------------------------------------------|-------------|-------------|-------|----------|
| $\text{mg}_{\text{A.M.}}/\text{cm}^{2\text{a}}$                                           | 1.51        | 1.63        | 1.91  | 3.43     |
| $\text{mg}_{\text{total}}/\text{cm}^{2\text{b}}$                                          | 1.89        | 2.04        | 2.39  | 4.29     |
| coating thickness ( $\mu\text{m}$ ) <sup>c</sup>                                          | 31.0        | 37.2        | 22.1  | 26.3     |
| coating density ( $\text{g}_{\text{total}}/\text{cm}^3$ ) <sup>b</sup>                    | 0.61        | 0.55        | 1.09  | 1.63     |
| specific capacity-1 ( $\text{mAh}/\text{g}_{\text{A.M.}}$ ) <sup>a</sup>                  | 994         | 1557        | 899   | 370      |
| specific capacity-2 ( $\text{mAh}/\text{g}_{\text{total}}$ )                              | 795         | 1246        | 719   | 296      |
| volumetric capacity <sup>d</sup> ( $\text{mAh}/\text{cm}^3_{\text{total}}$ ) <sup>b</sup> | 484         | 682         | 777   | 483      |

Notes; <sup>a</sup>values based on the mass of active material (A.M.) only, <sup>b</sup>values based on the total mass inclusive of active material, binder and conductive additive coated on electrode, <sup>c</sup>measured by SEM of electrode cross-section, and <sup>d</sup>volumetric capacity ( $\text{mAh}/\text{cm}^3_{\text{total}}$ ) = specific capacity-2 ( $\text{mAh}/\text{g}_{\text{total}}$ )  $\times$  coating density ( $\text{g}_{\text{total}}/\text{cm}^3$ ).

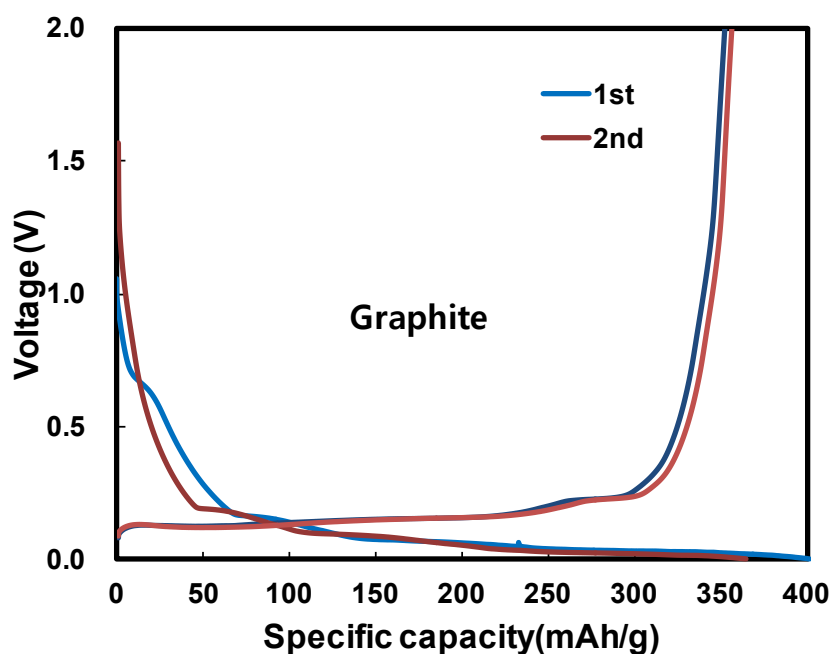**Figure S11.** Voltage profiles of graphite for the initial two cycles at the current of  $100 \text{ mA g}^{-1}$  between  $0.005 - 2.0 \text{ V}$ .
